# Supplementary material
Source: HighWire-hosted journal article supplement (https://qdcxjkg.com/highwire/filestream/113096/field_highwire_adjunct_files/0/Online_Data_Supplement_Figure_S1.pdf)

Online Data Supplement Figure S1

Photograph of face-mask in series with pneumotachograph and nebuliser used for nebulisation of tartaric acid and measurement of reflex cough flow.

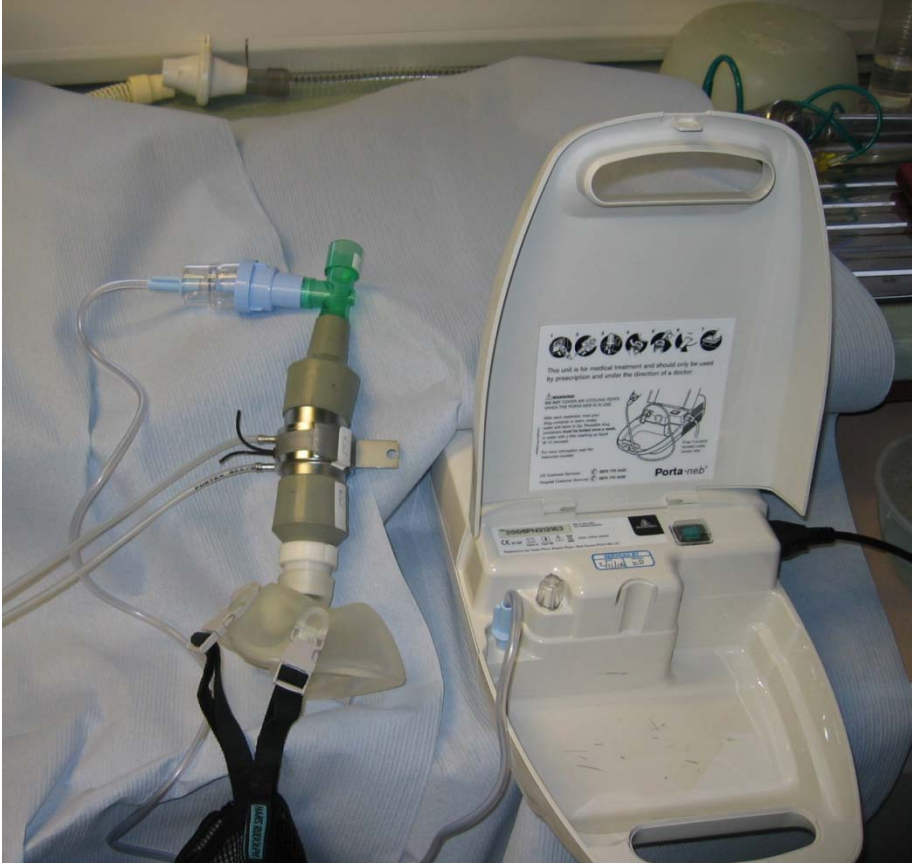

Supplement: Online_Data_Supplement_Figure_S1.pdf [file Online_Data_Supplement_Figure_S1.pdf]
